# Supplementary material
Source: publisher site journal article supplement (https://www.dovepress.com/article/supplementary_file/581623/581623%20Supplementary%20table%201_1.docx)
Supplement: Supplementary file 1 [file 581623%20Supplementary%20table%201_1.docx]

**Supplementary Table 1 Multi-collinearity testing of the variables**

| **Variables** | **Variance Inflation Factor** |
| --- | --- |
| Age, | 1.86 |
| Baseline FACED score | 1.74 |
| Sex | 1.46 |
| Smoking status | 1.47 |
| Bronchiectasis pharmacotherapy |  |
| ICS | 1.22 |
| Macrolide | 1.25 |
| Inhaled antibiotics | 1.05 |
| Number of bronchiectasis exacerbations in the past 12 months | 1.23 |
